# Supplementary material
Source: bioRxiv or medRxiv preprint supplement (https://www.biorxiv.org/highwire/filestream/105259/field_highwire_adjunct_files/0/347336-1.pdf)
Supplement: Supplementary file [file 347336-1.pdf]

## Supplementary Material

**Supplementary Figure 1.** Phylogeny of NRY haplogroup Q1 sequences. Terminal branches are color-coded by linguistic affiliation as in Figure 1.

**Supplementary Figure 2.** Pairwise  $\Phi_{ST}$ s for mtDNA in lower diagonal and NRY in upper diagonal. The stars indicate significance (p-value <0.05) after Benjamin-Hochberg correction for multiple tests.

**Supplementary Figure 3.** MDS plots for mtDNA and NRY. Stress values (within parentheses) are indicated in percentages.

**Supplementary Figure 4.** Mantel test depicted as histograms of the distribution of the correlation between distance matrices after 9999 random permutations for: A) mtDNA and NRY genetic distances, B) mtDNA and geographic distances, and C) NRY and geographic distances. The point indicates the observed correlation (r) between matrices.

**Supplementary Figure 5.** Network of haplotypes from haplogroup Q1 color-coded by language family. Clades highlighted with circles contain related haplotypes discussed in the main text.

**Supplementary Figure 6.** Phylogeny of mtDNA sequences. Terminal branches are color-coded by linguistic affiliation as in Figure 1. Main Native American haplogroups are indicated.

**Supplementary Figure 7.** BSP plots from different sampling schemes of the NRY. A) Pooled. B) Scattered. C) By population. Dotted lines represent the 95% highest posterior density (HPD).

**Supplementary Figure 8.** BSP plots from different sampling schemes of the mtDNA. A) Pooled. B) Scattered. C) By population. Dotted lines represent the 95% highest posterior density (HPD).

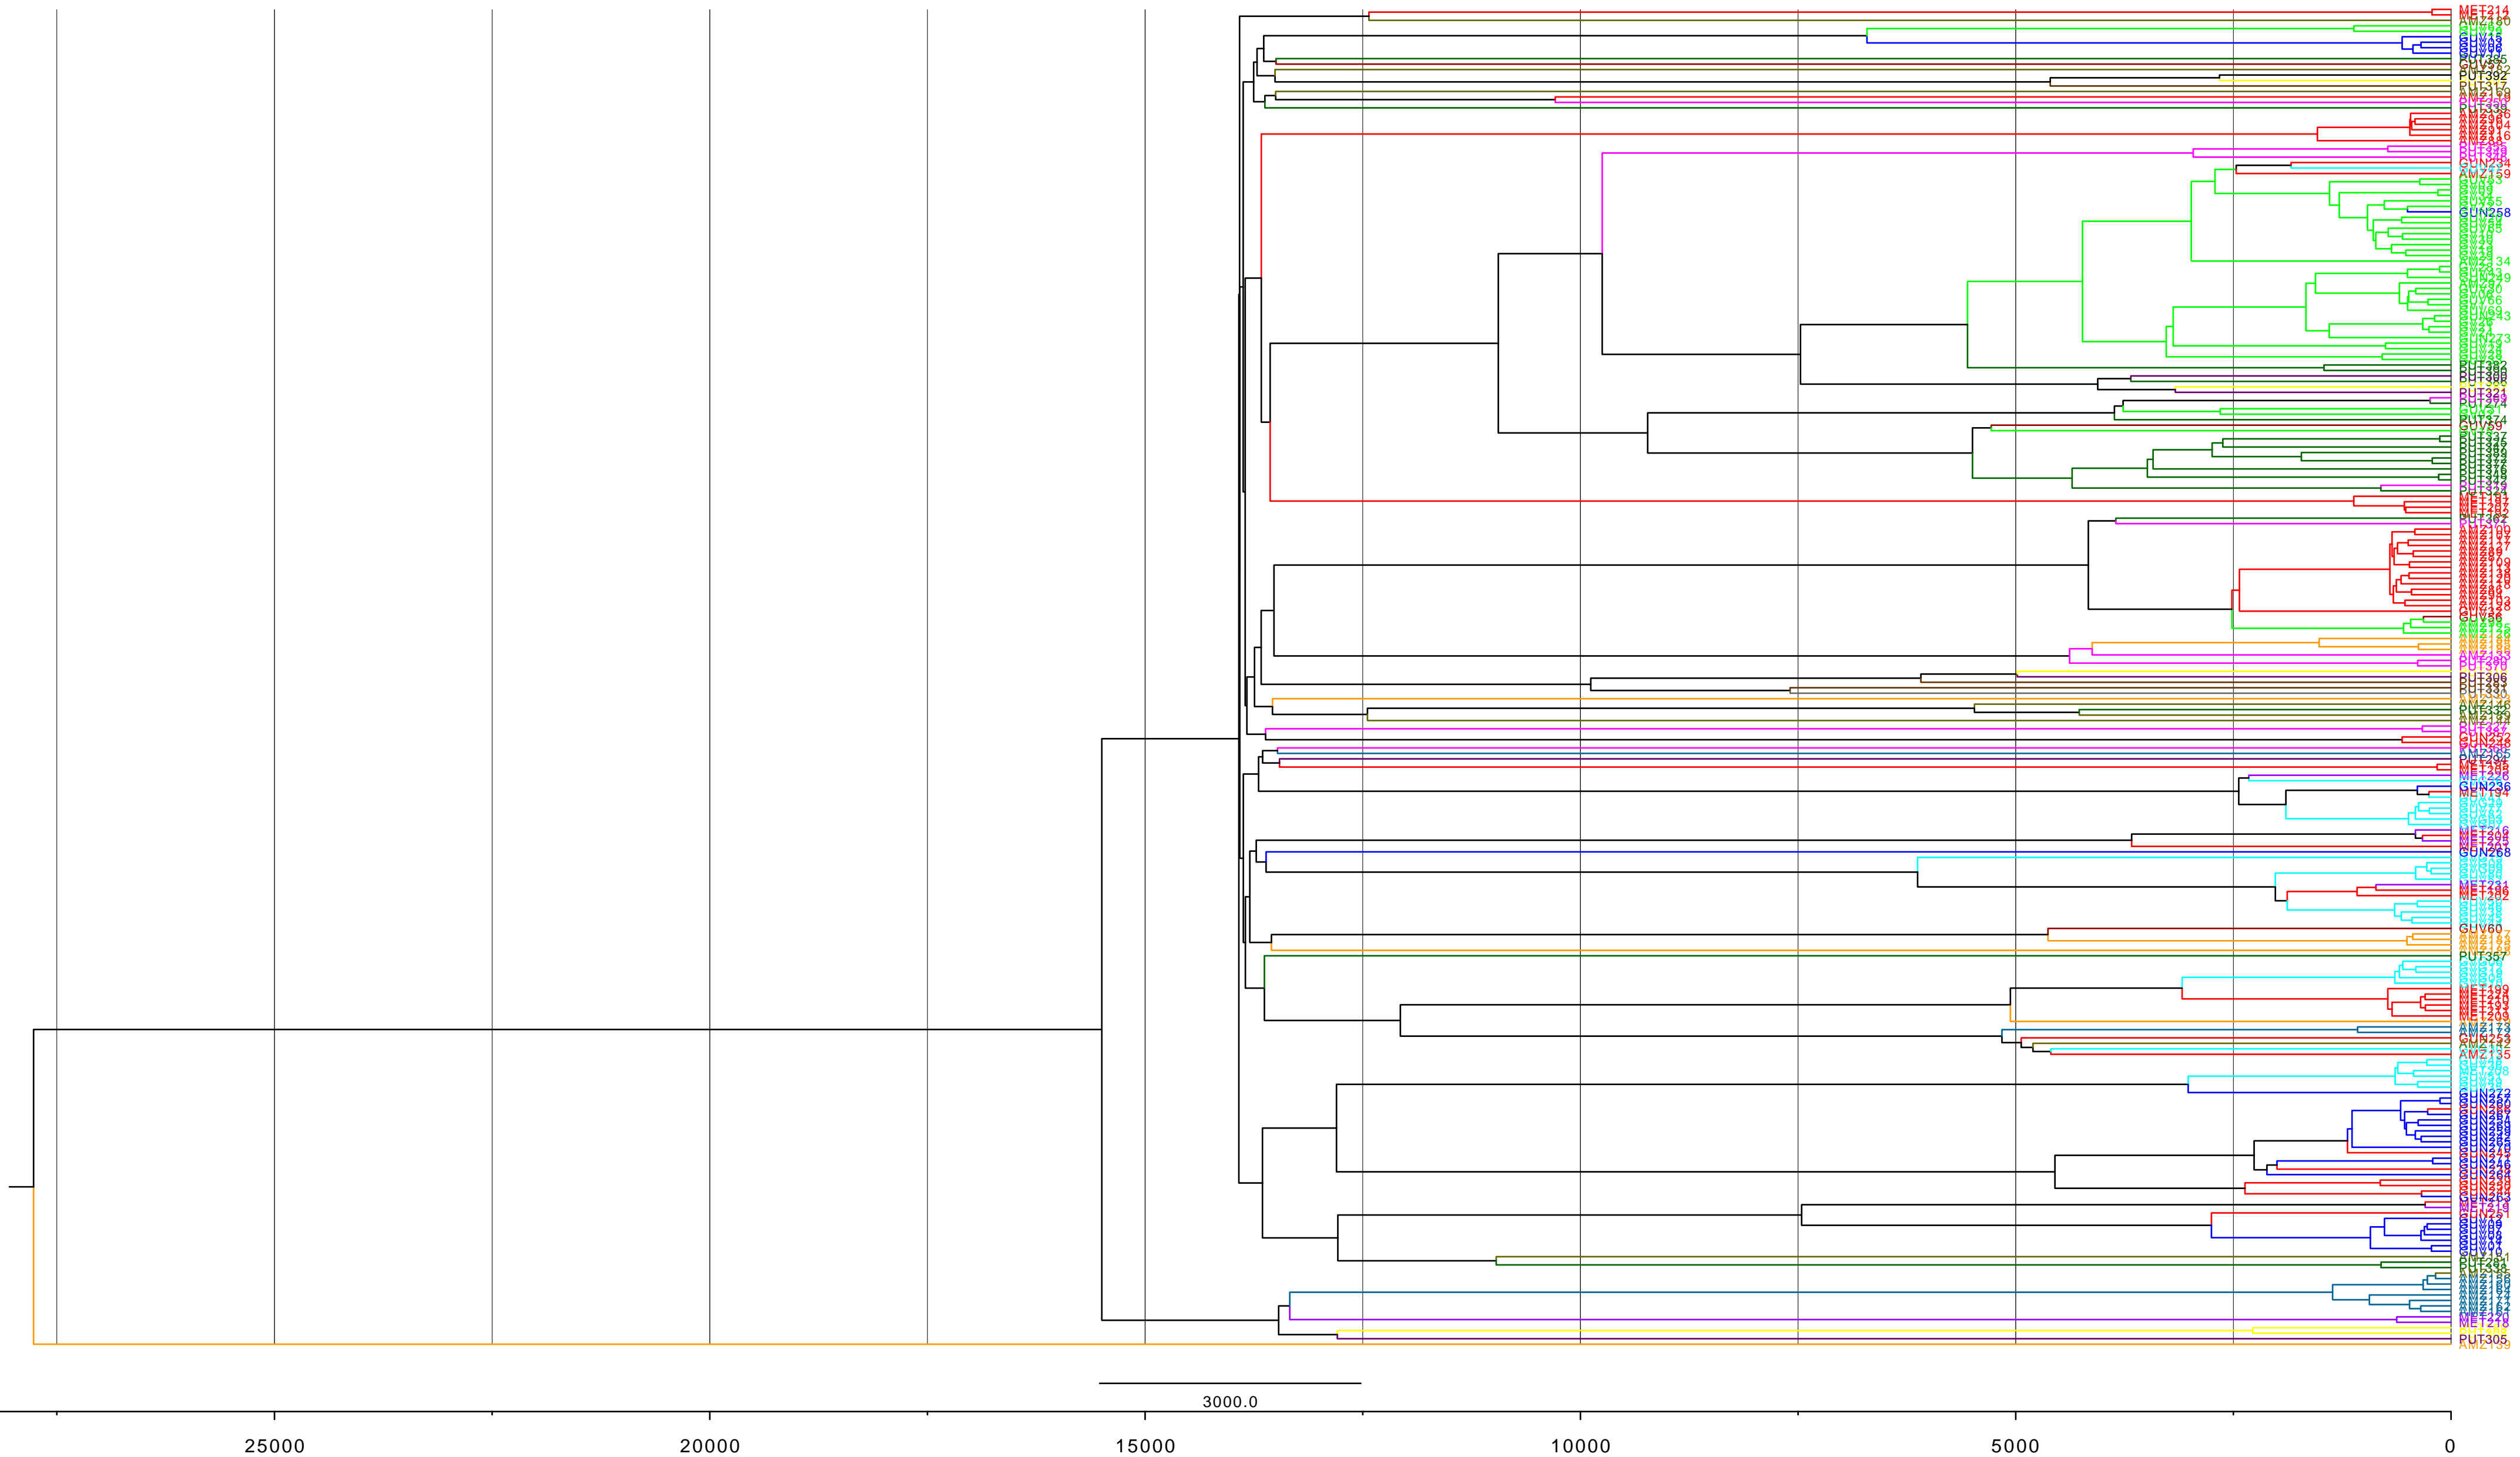

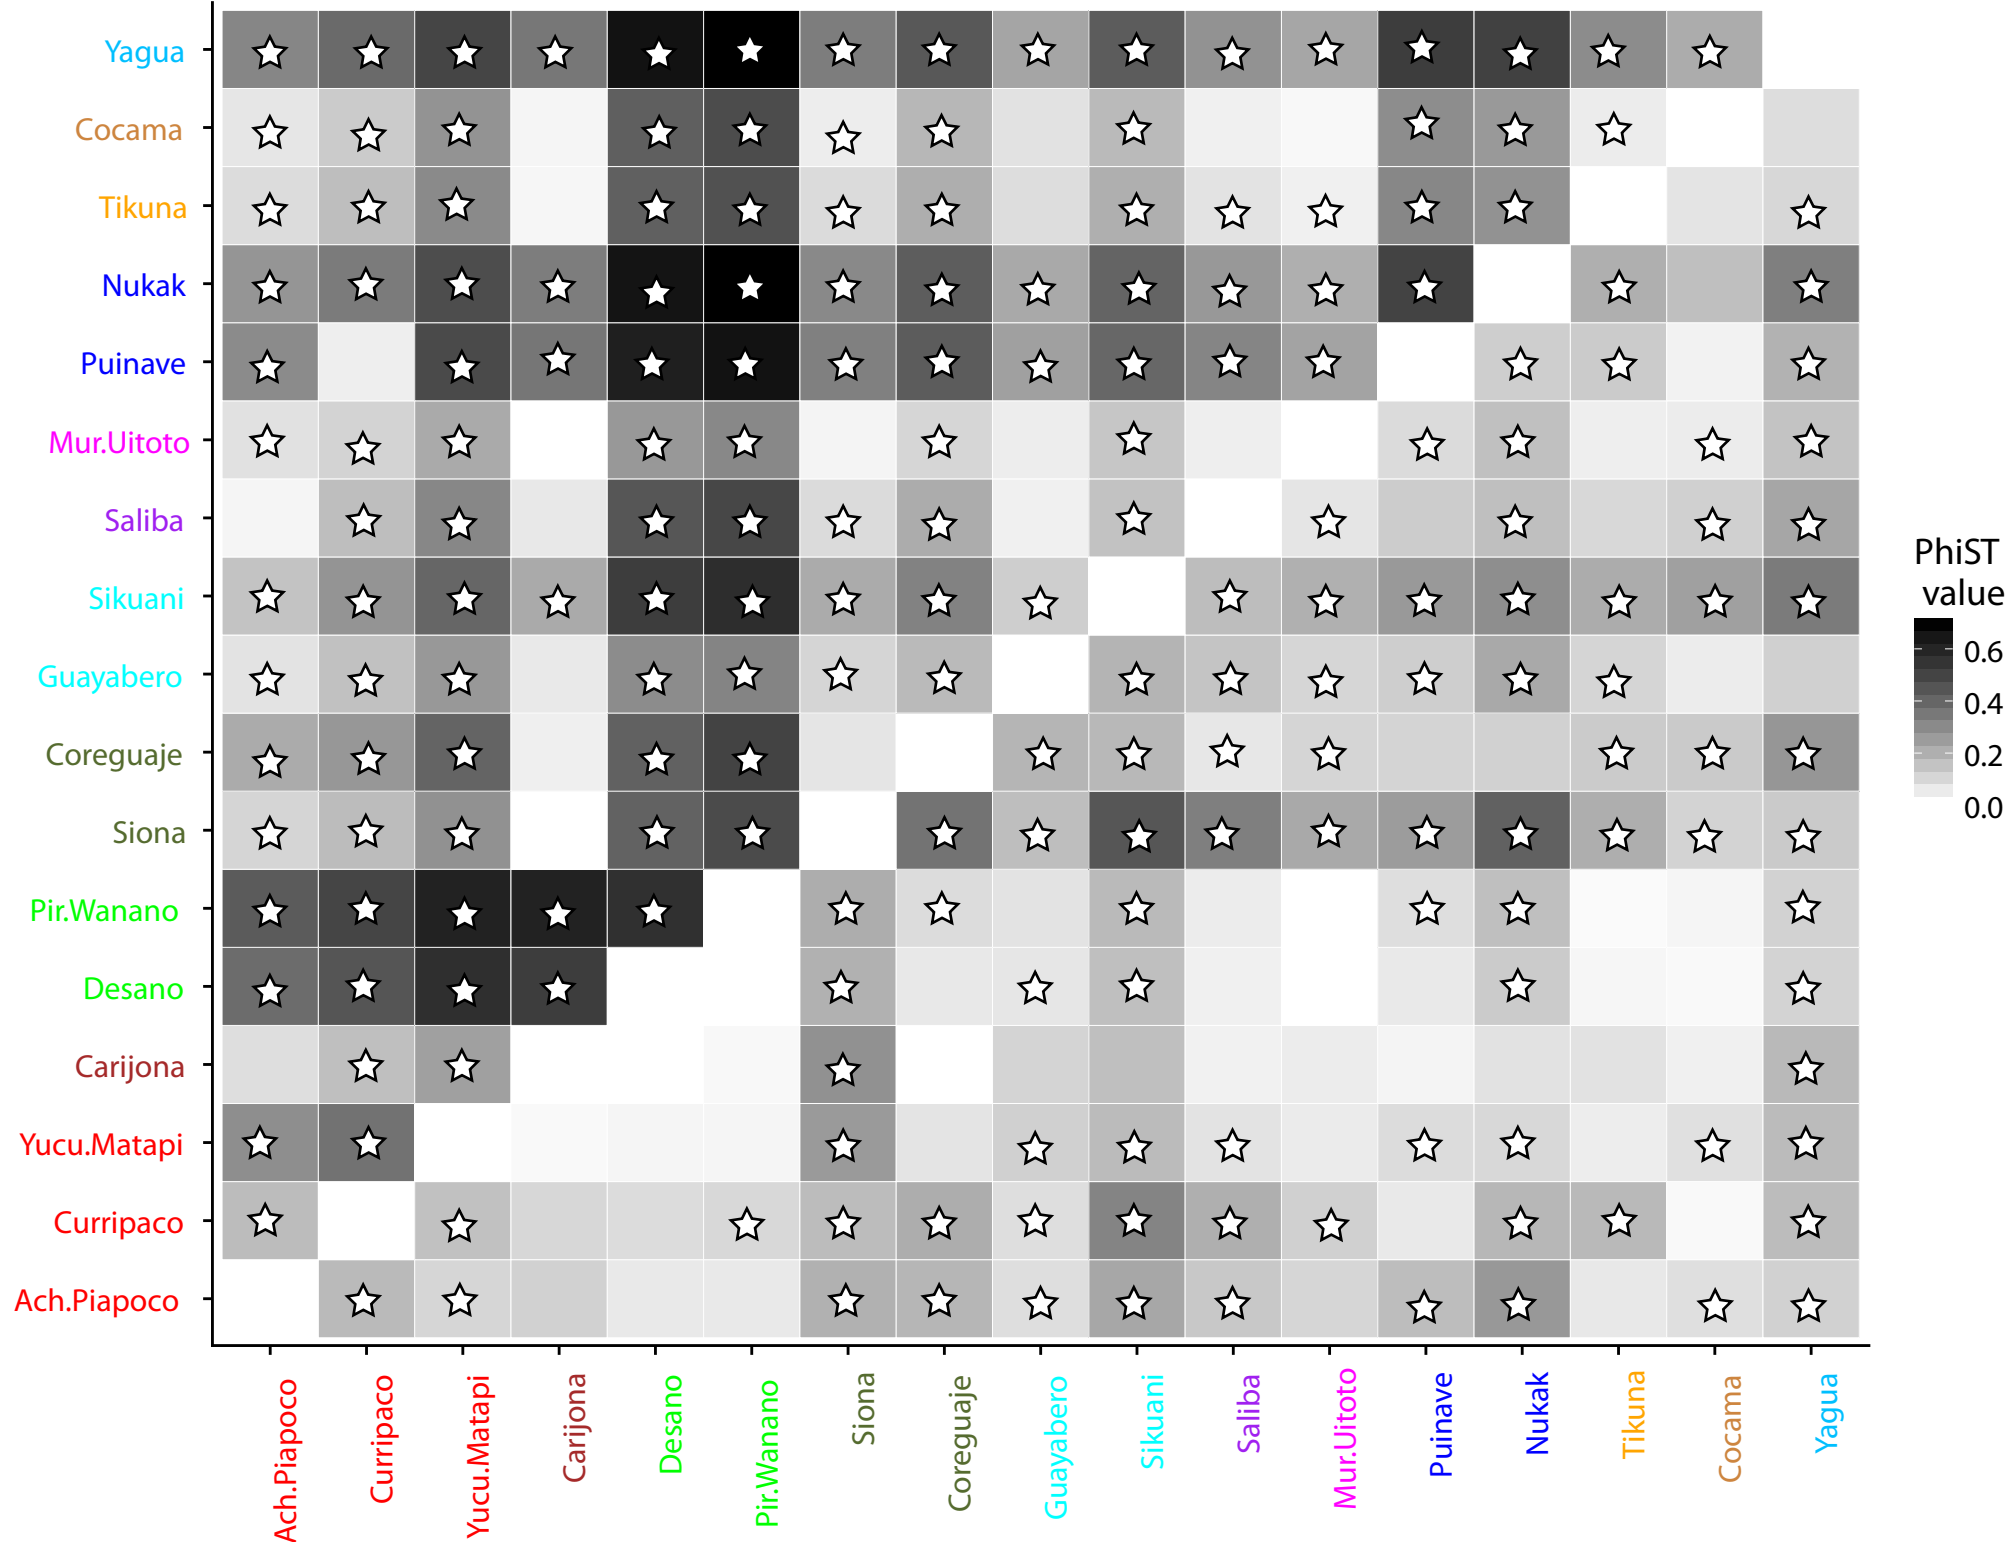

mtDNA (stress=6.4)

- + Arawakan
- + Carib
- + Eastern-Tukanoan
- + Western-Tukanoan
- + Guahiban
- + Piaroa-Saliba
- + Huitotoan
- + Maku-Puinave
- + Tikuna
- + Tupi
- + Peban-Yagua

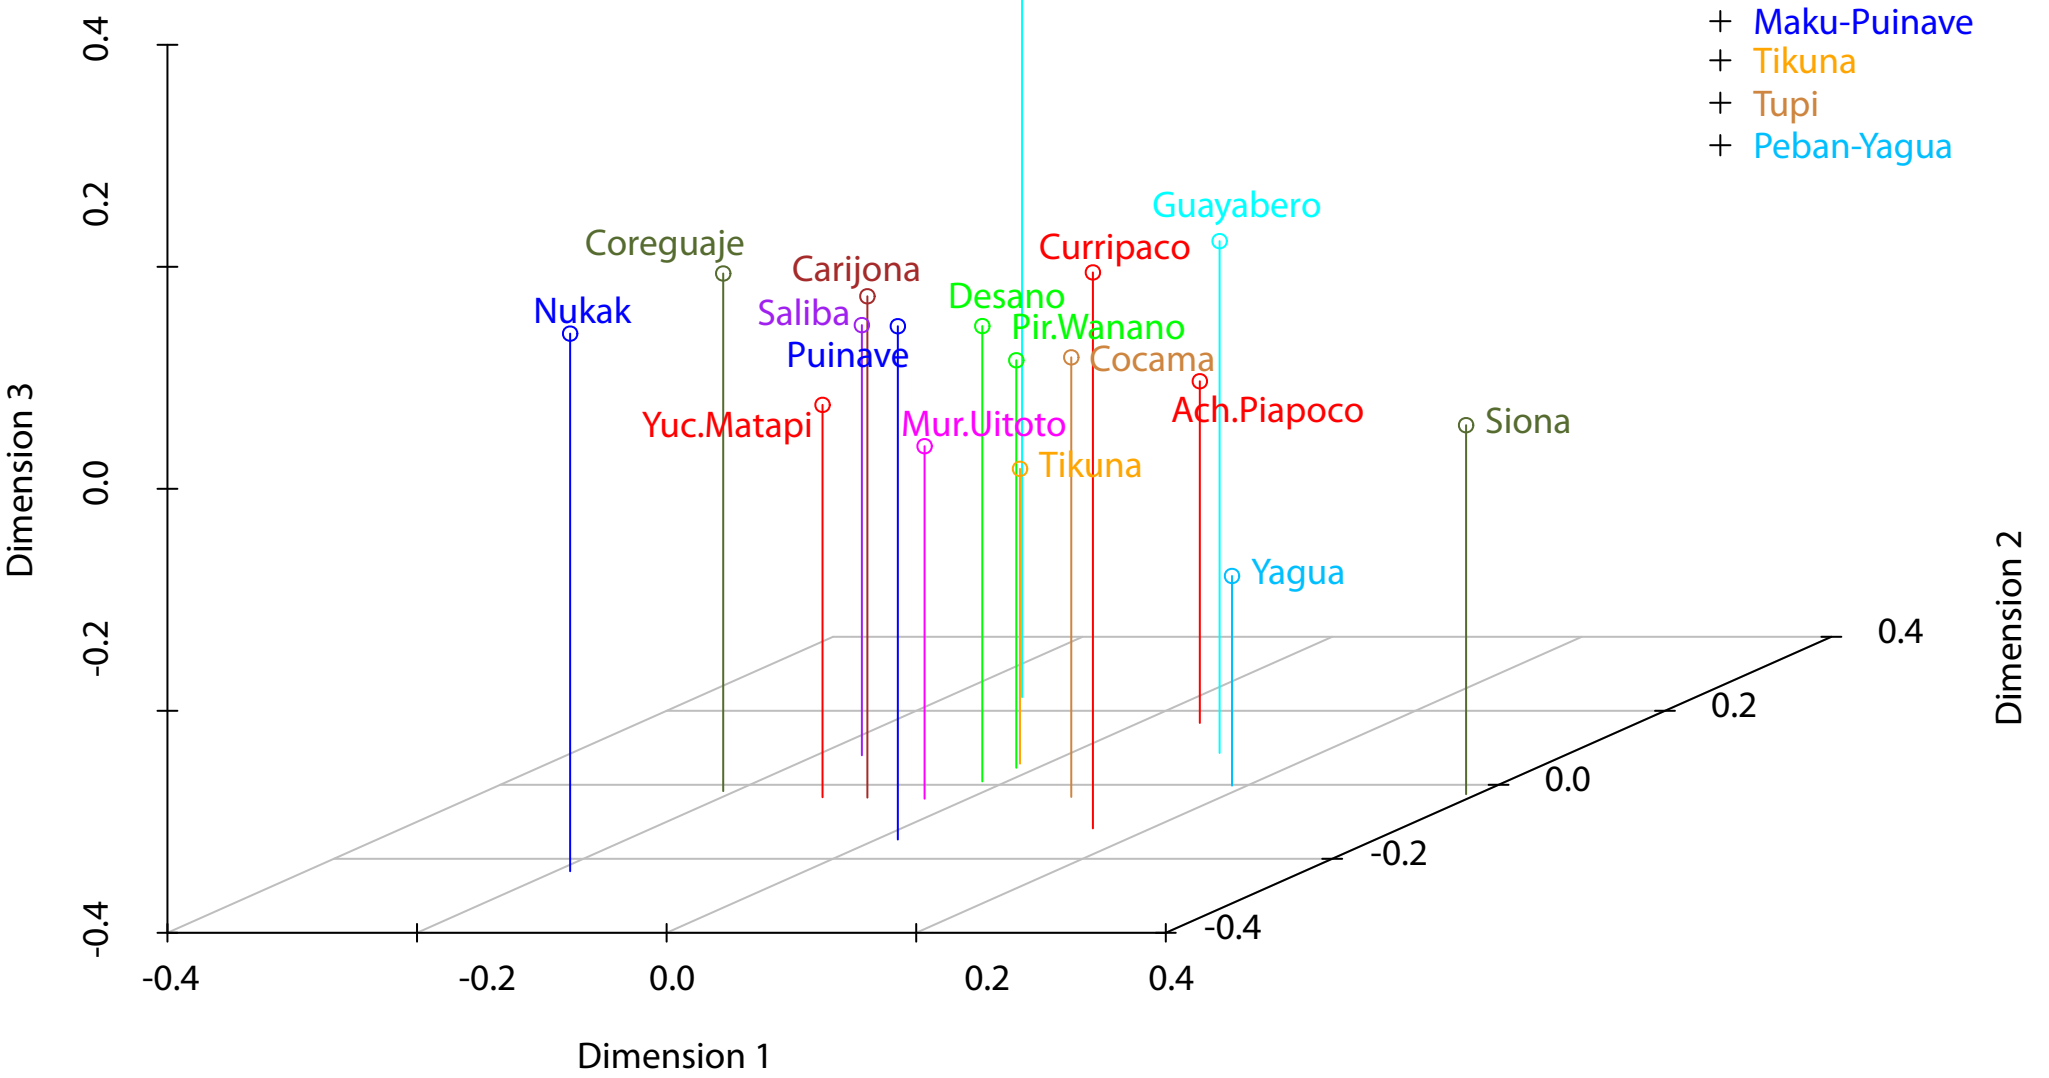

NRY (stress=10.41)

- + Arawakan
- + Carib
- + Eastern-Tukanoan
- + Western-Tukanoan
- + Guahiban
- + Piaroa-Saliba
- + Huitotoan
- + Maku-Puinave
- + Tikuna
- + Tupi
- + Peban-Yagua

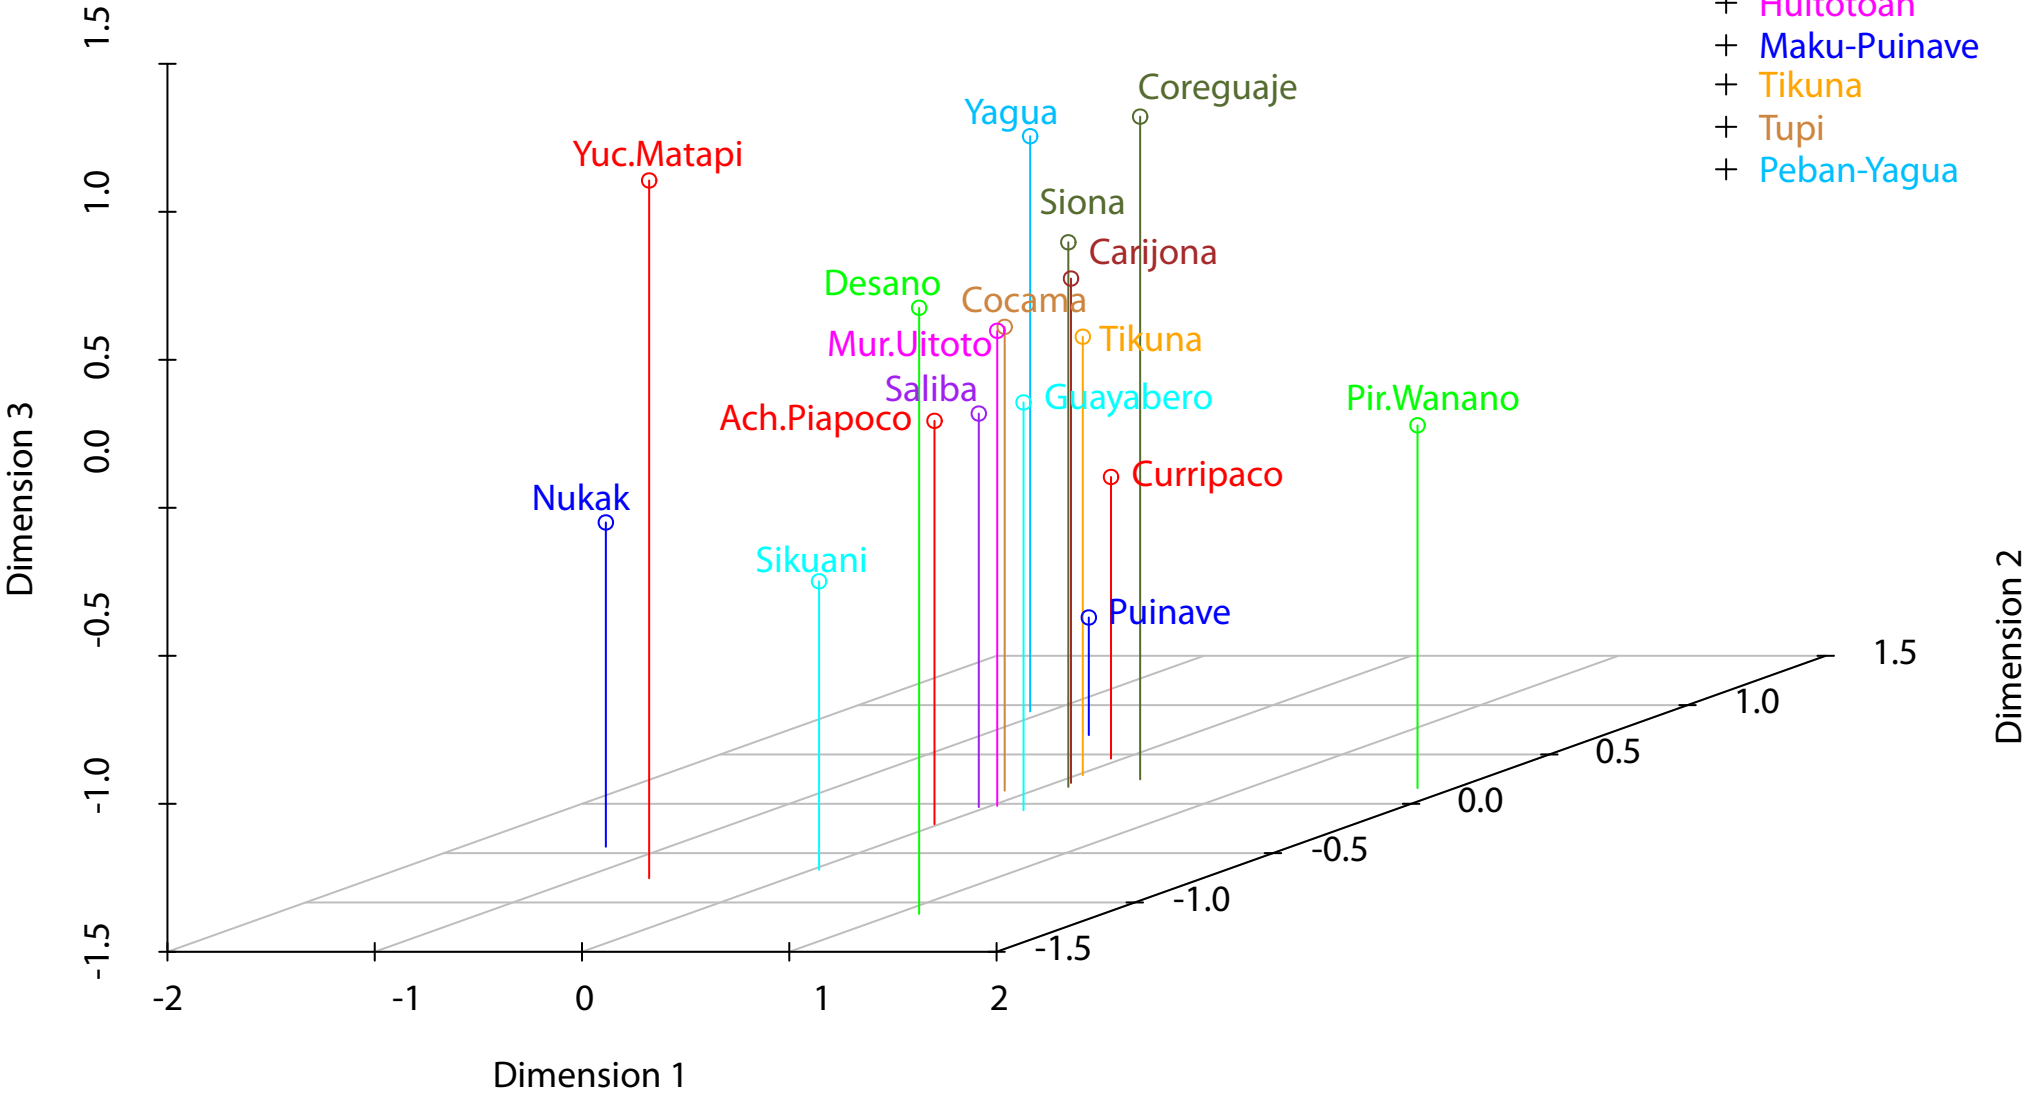

A)

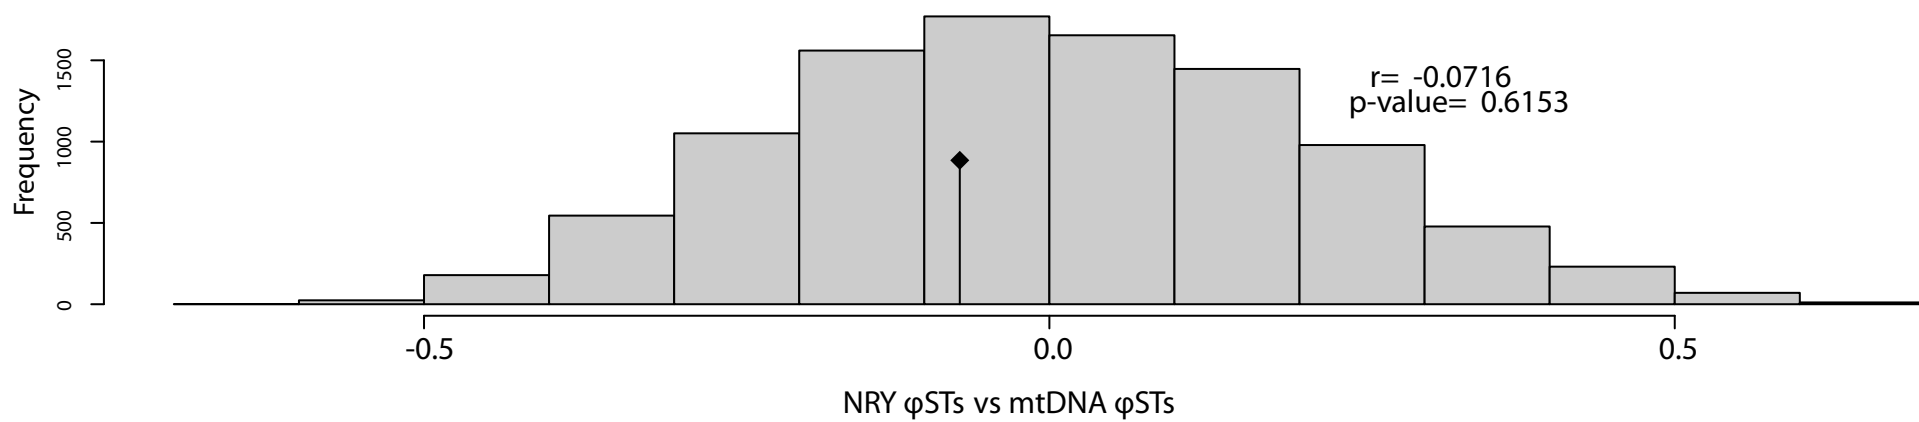

B)

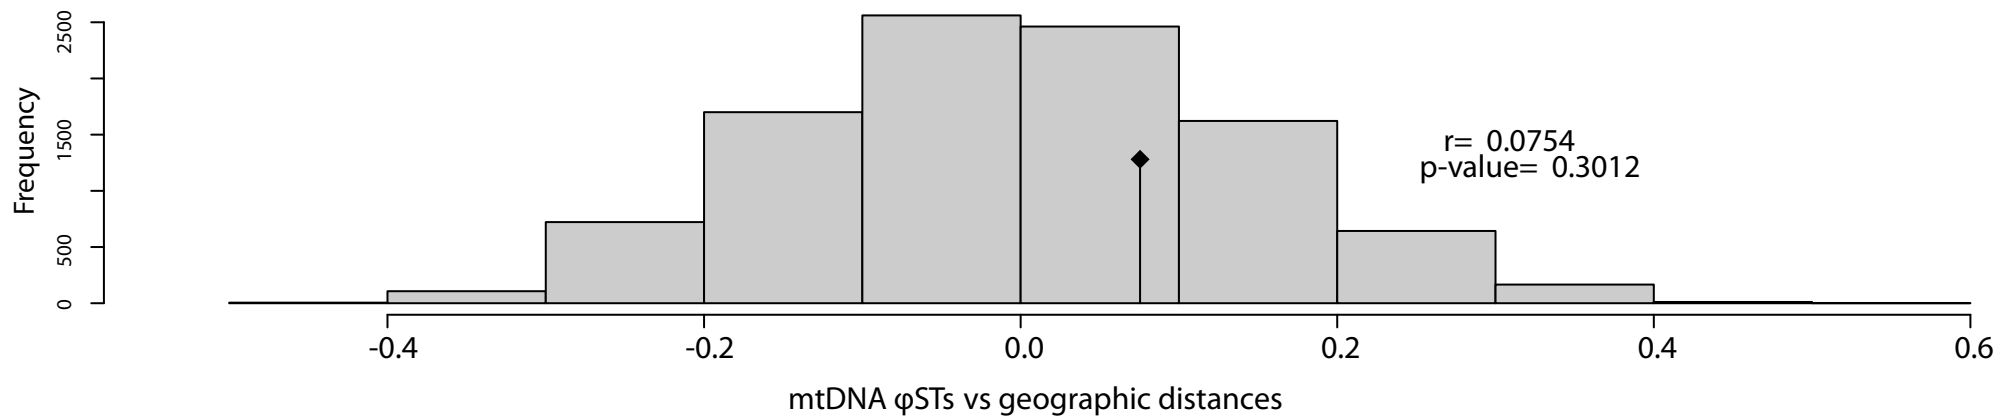

C)

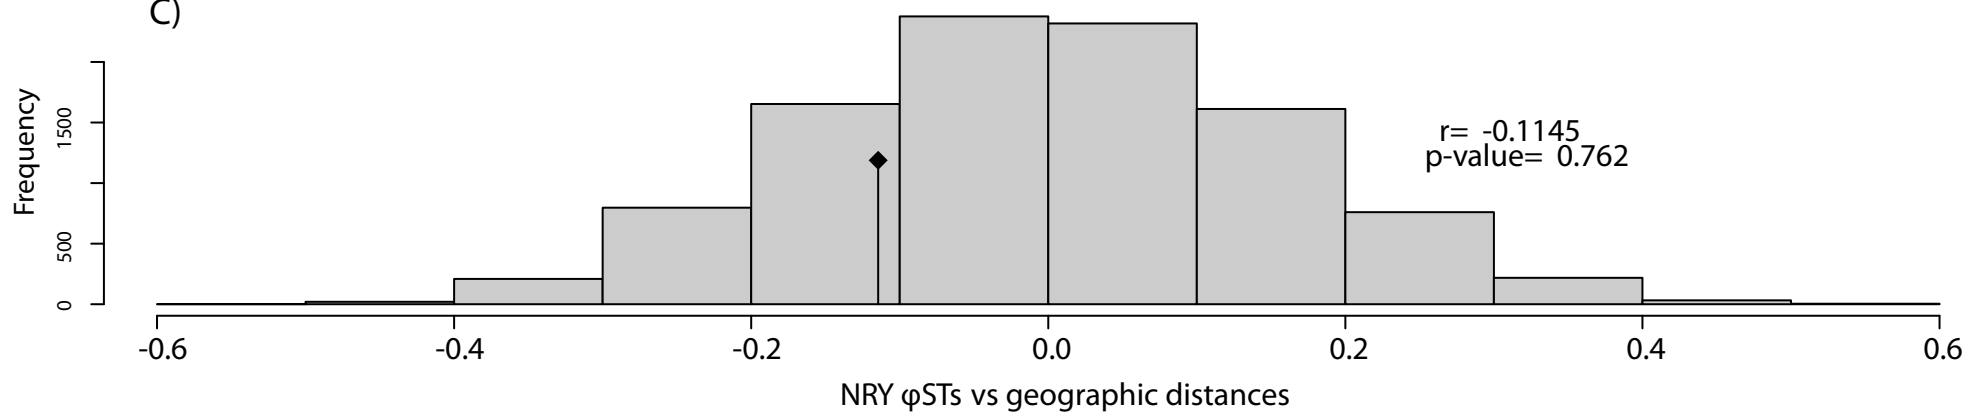

Group1

- Arawakan
- East-Tukanoan
- Huitoto
- Tikunan
- Tupi
- Peba-Yaguan
- Maku-Puinave
- Guahiban
- Caribe
- Piaroa
- West-Tukanoan
- Quechuan
- Kamentsa
- Pasto
- Cofan
- Nasa

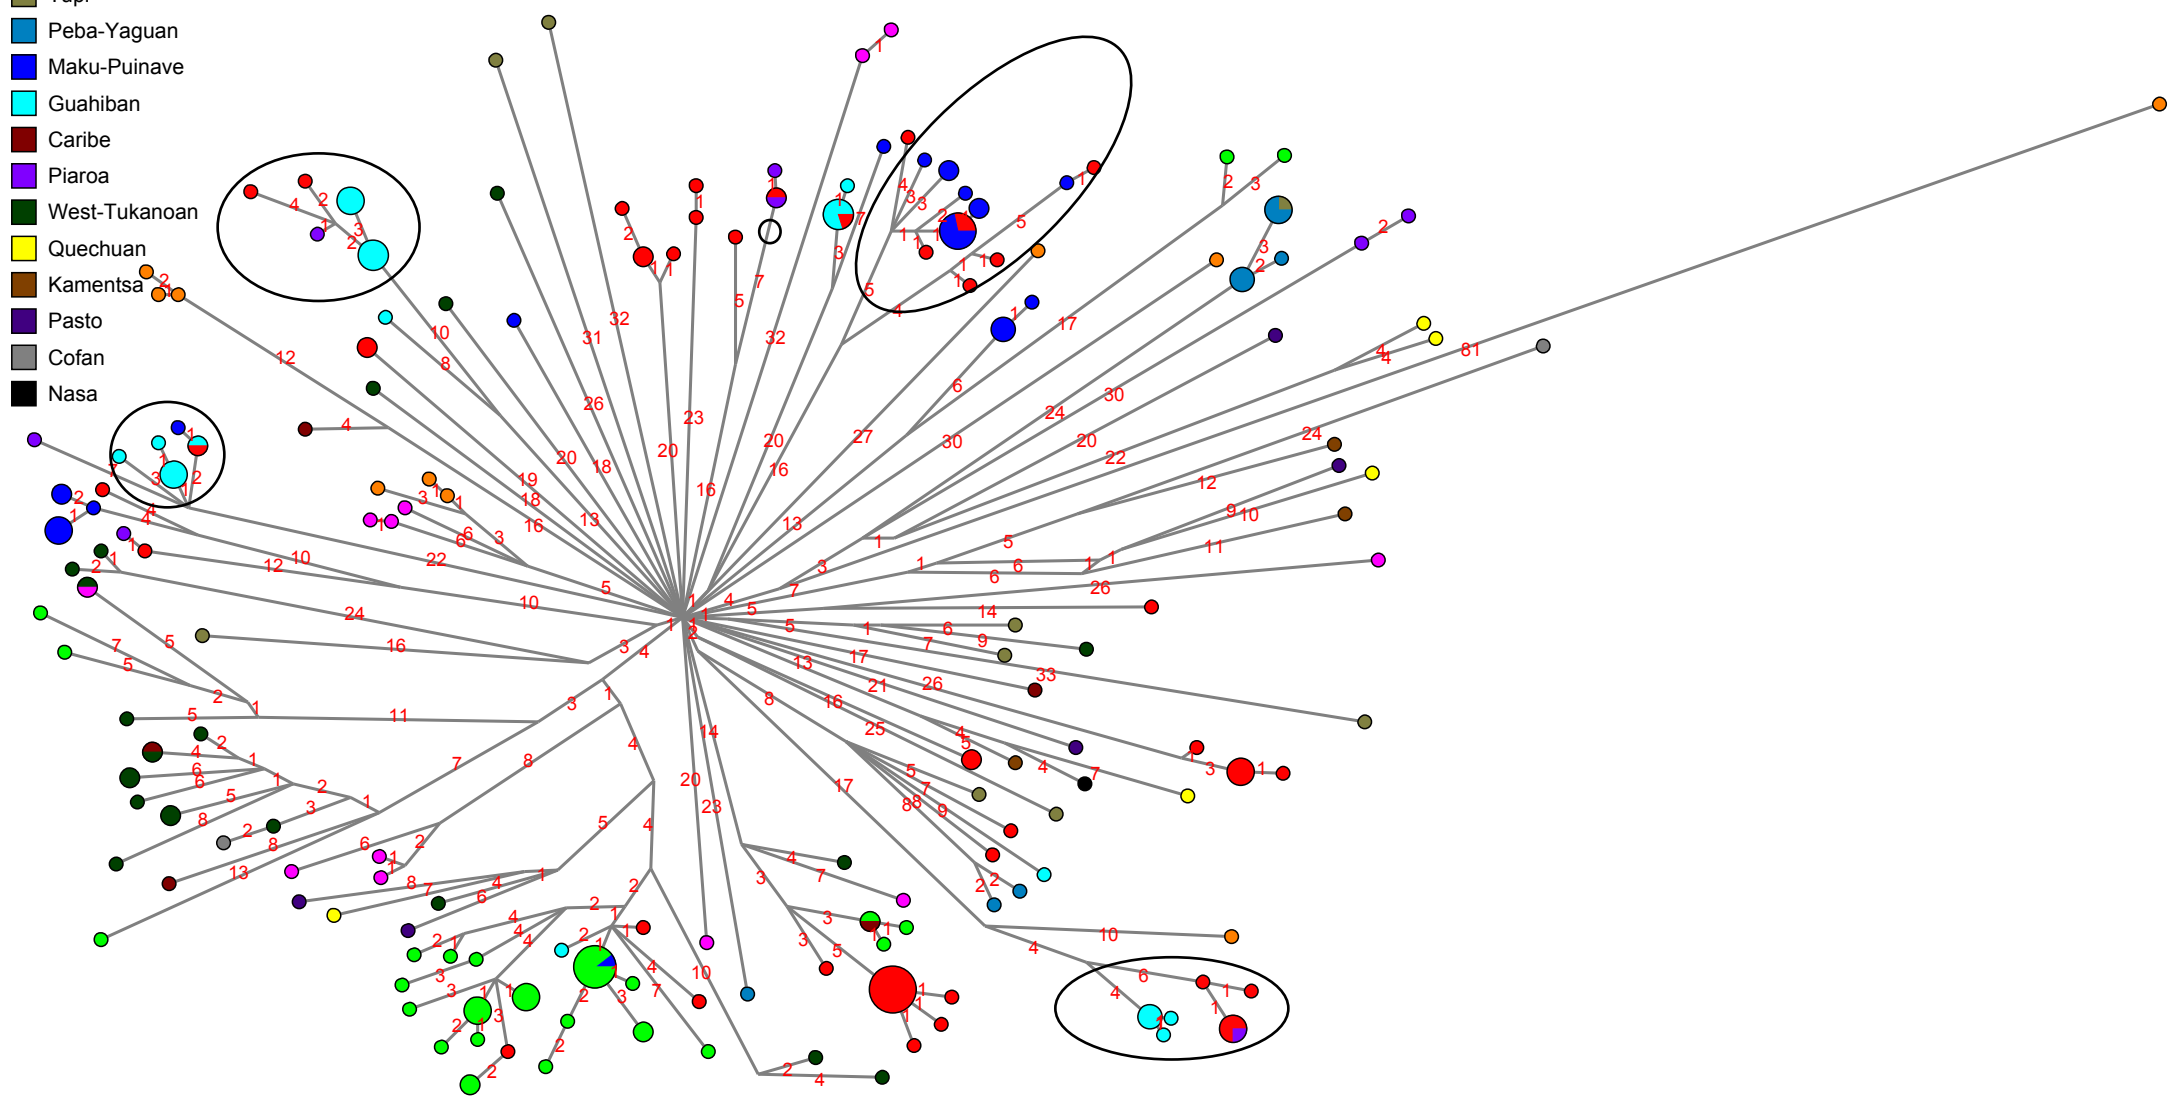

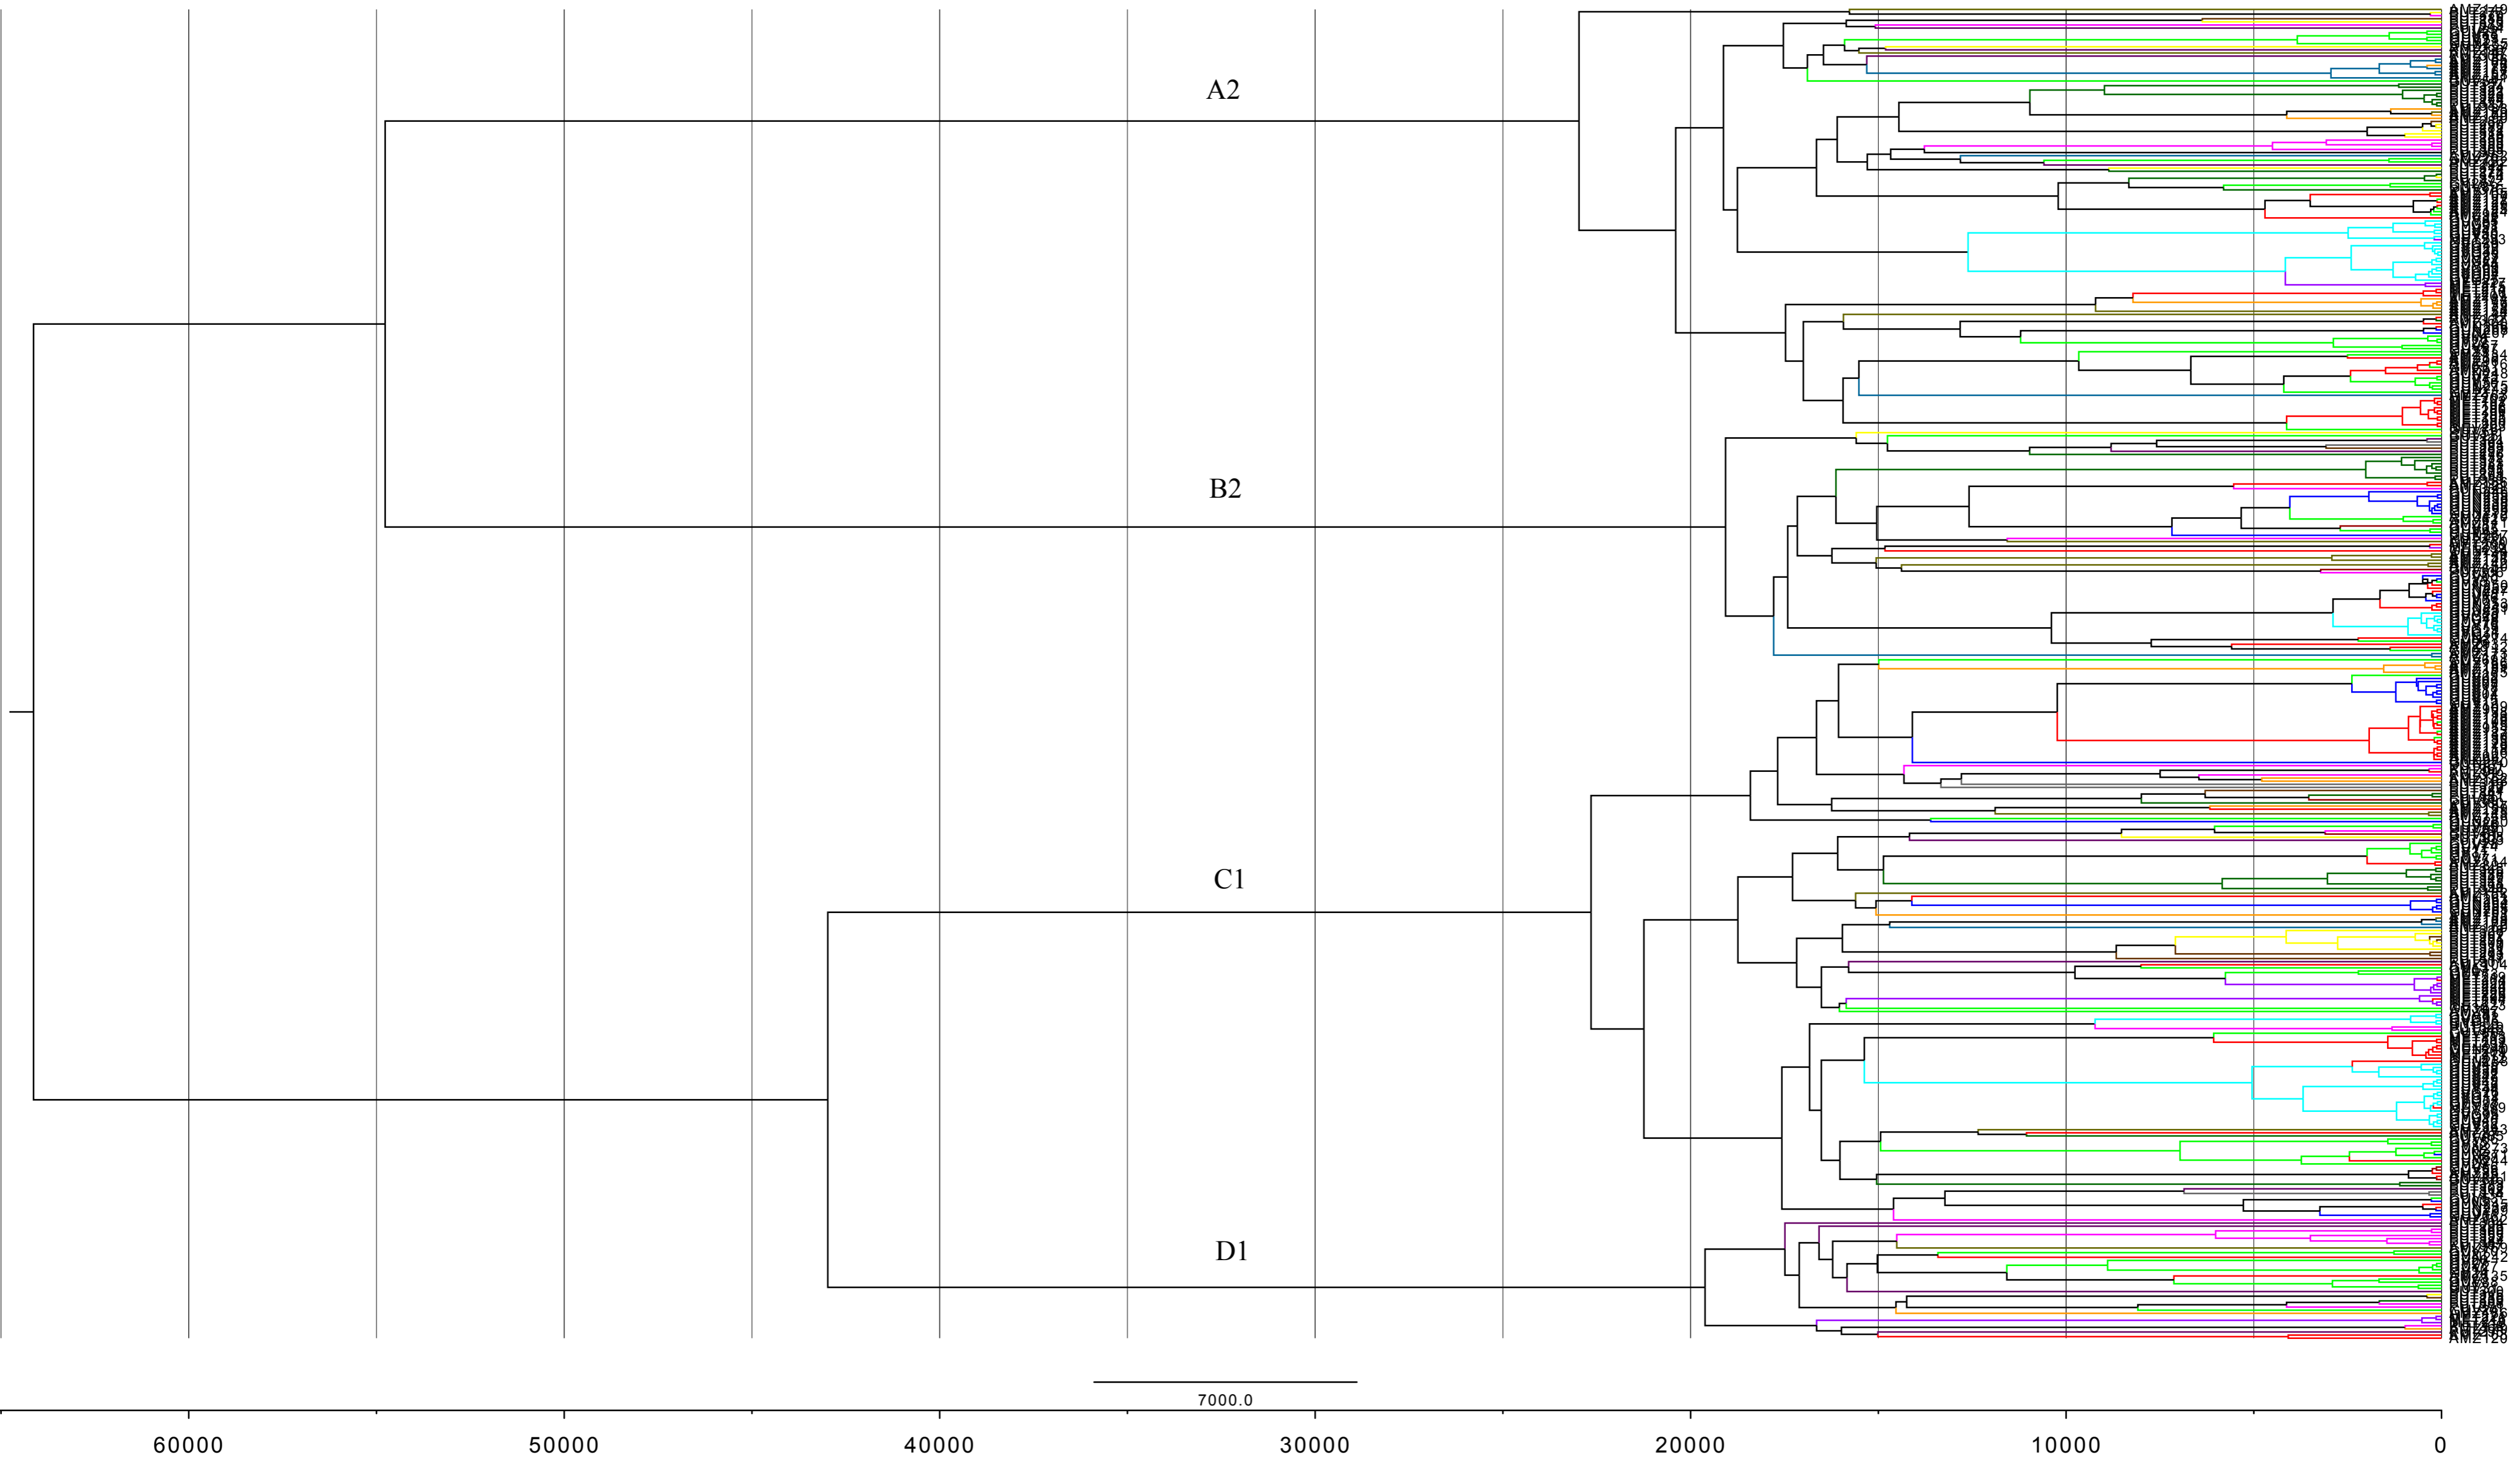

A2

B2

C1

D1

7000.0

60000

50000

40000

30000

20000

10000

0



A)

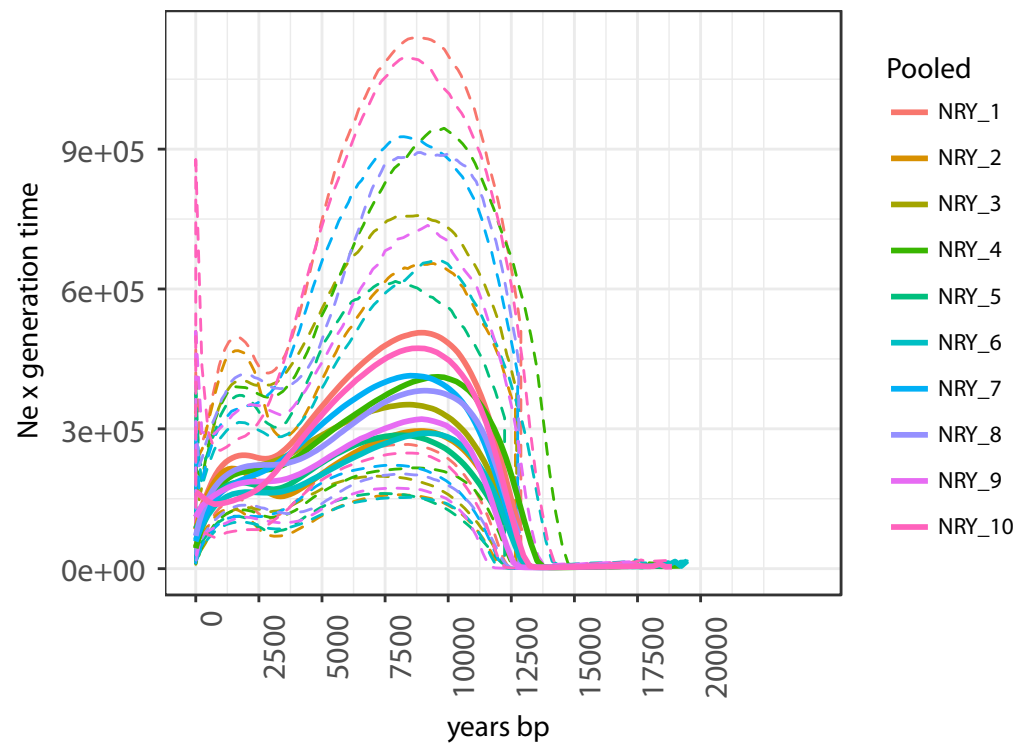

B)

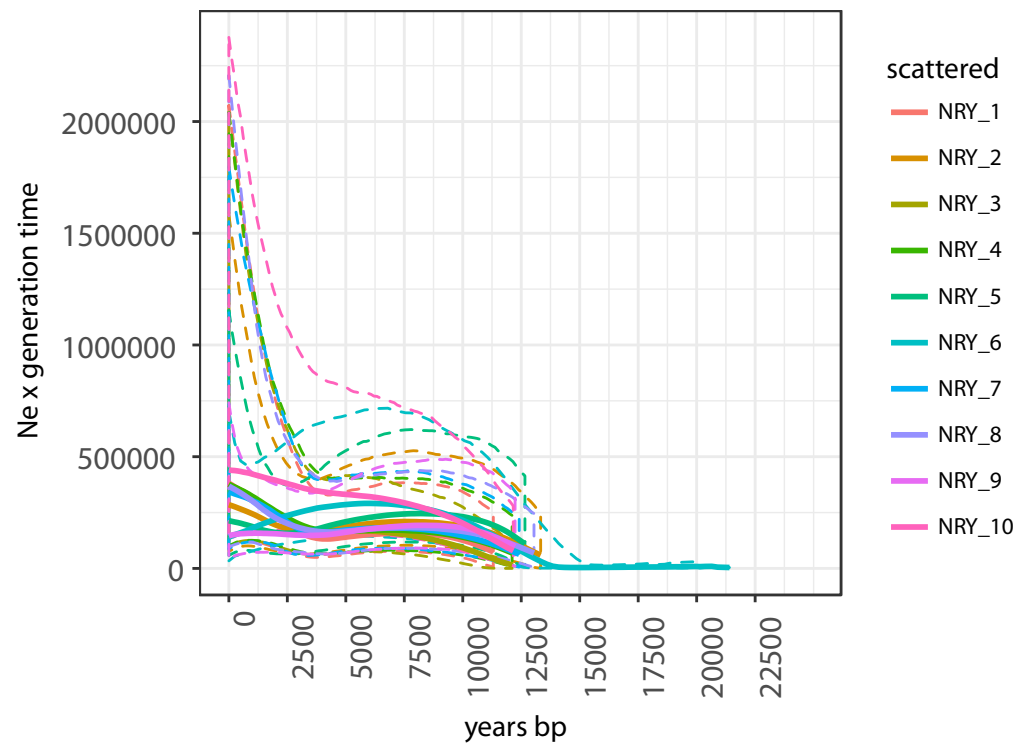

C)

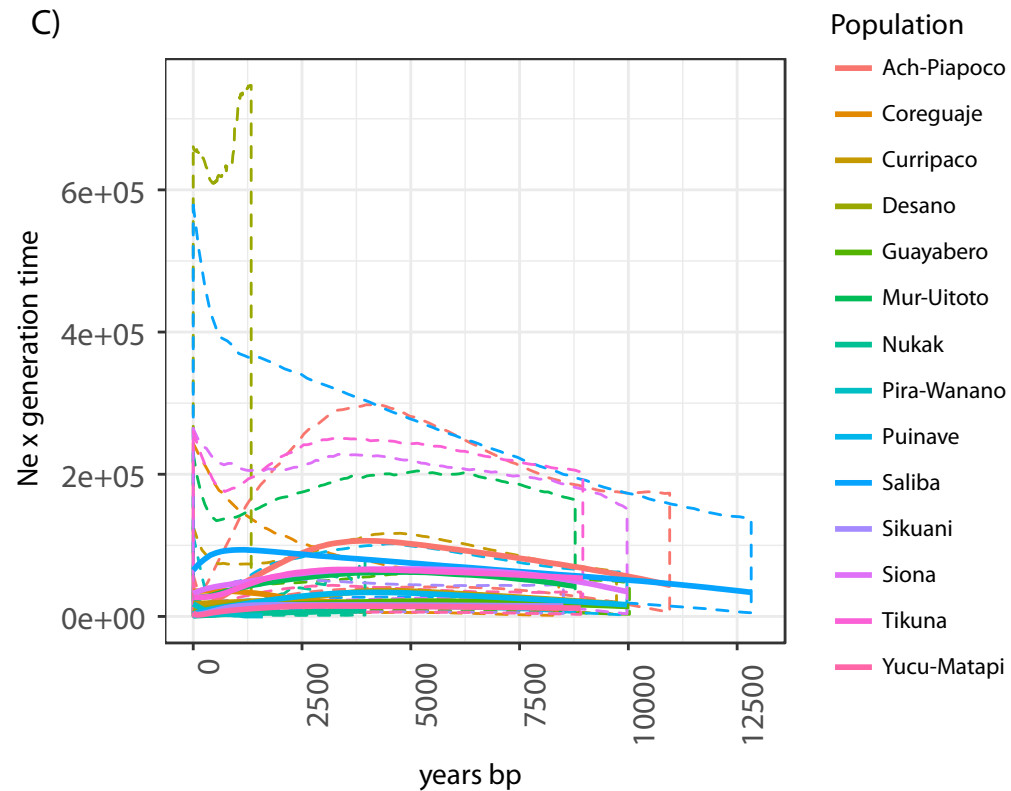

A)

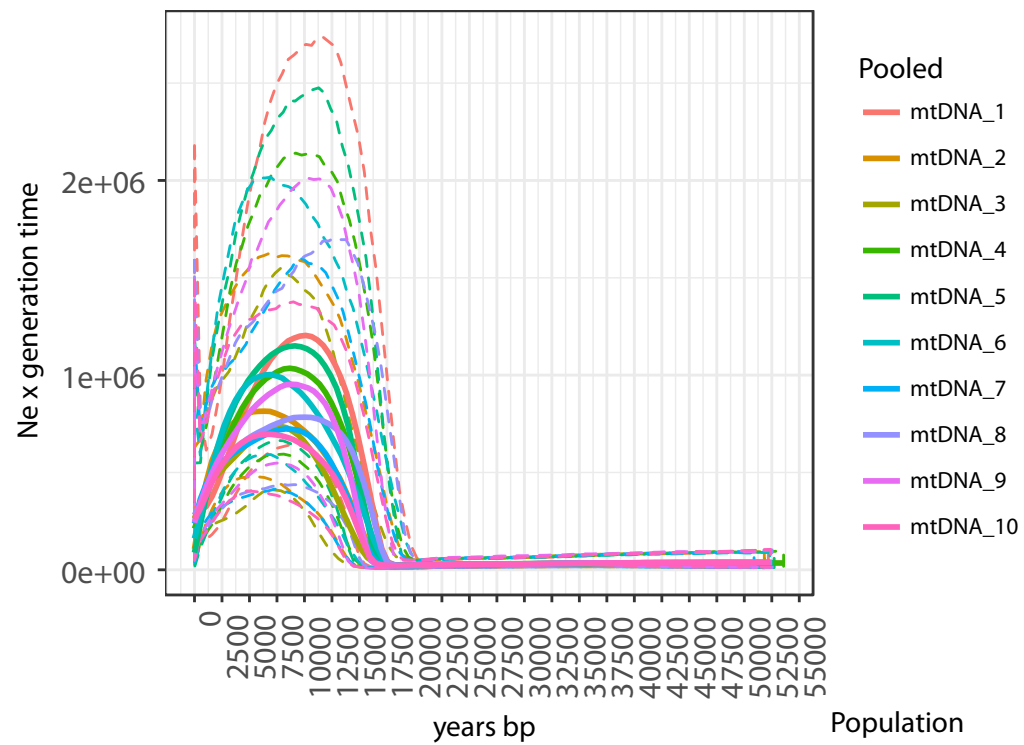

B)

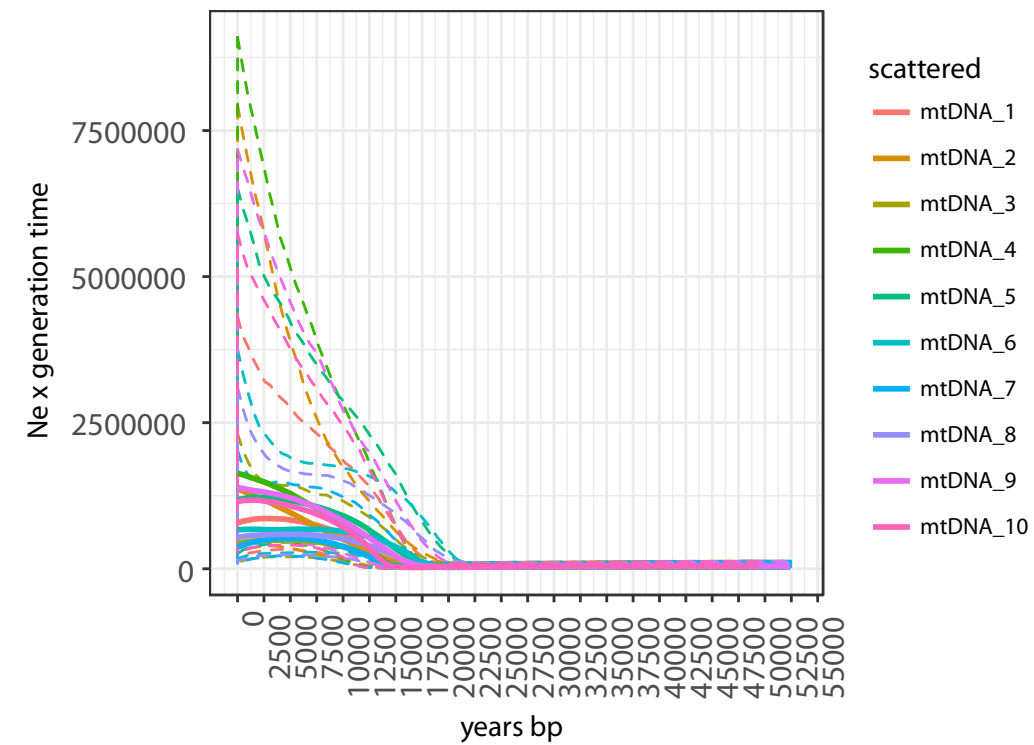

C)

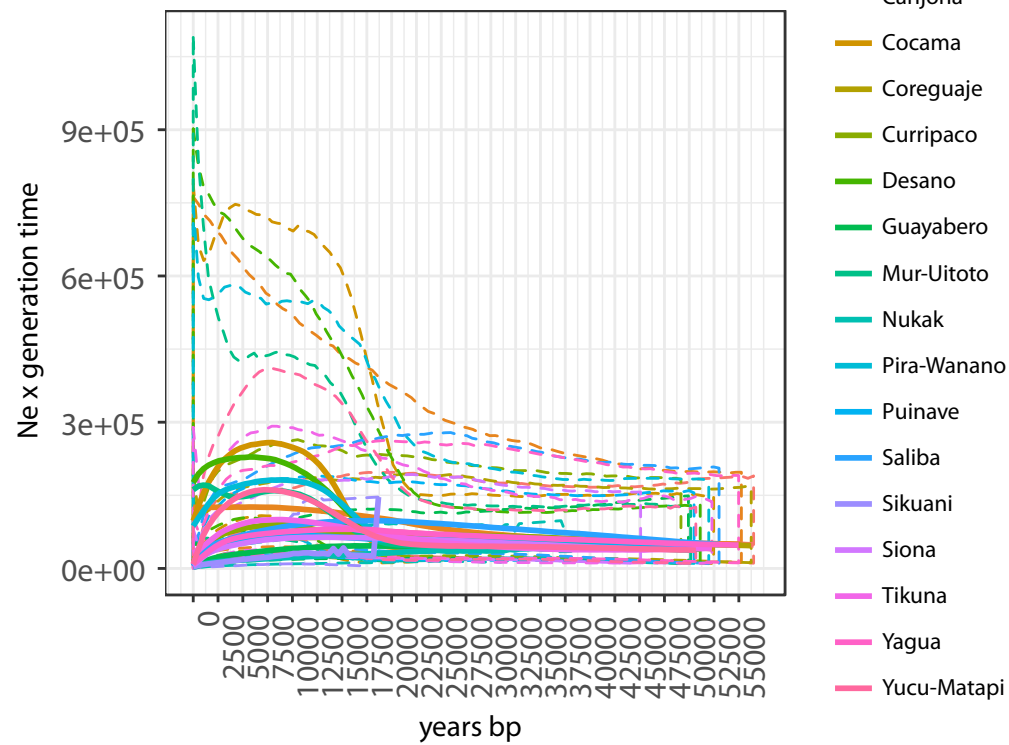

Supplementary Table 1. Sequencing coverage per sample

| ID     | mean coverage | No. of non-genotyped sites |
|--------|---------------|----------------------------|
| AMZ100 | 31.86         | 1                          |
| AMZ103 | 30.49         | 3                          |
| AMZ104 | 15.18         | 10                         |
| AMZ107 | 52.2          | 0                          |
| AMZ109 | 25.58         | 2                          |
| AMZ113 | 29.1          | 0                          |
| AMZ116 | 54.98         | 0                          |
| AMZ117 | 40.98         | 1                          |
| AMZ118 | 27.81         | 5                          |
| AMZ119 | 29.2          | 3                          |
| AMZ120 | 18.57         | 6                          |
| AMZ125 | 44.8          | 0                          |
| AMZ126 | 24.22         | 1                          |
| AMZ127 | 73.21         | 0                          |
| AMZ128 | 97.5          | 0                          |
| AMZ133 | 28.41         | 1                          |
| AMZ134 | 37.82         | 4                          |
| AMZ135 | 30.7          | 0                          |
| AMZ136 | 48.26         | 0                          |
| AMZ138 | 26.77         | 2                          |
| AMZ139 | 64.53         | 0                          |
| AMZ140 | 87.44         | 4                          |
| AMZ142 | 47.33         | 0                          |
| AMZ144 | 75.03         | 0                          |
| AMZ146 | 21.2          | 6                          |
| AMZ147 | 27.84         | 6                          |
| AMZ151 | 36.44         | 0                          |
| AMZ153 | 48.01         | 0                          |
| AMZ155 | 42.89         | 0                          |
| AMZ156 | 31.88         | 1                          |
| AMZ157 | 26.32         | 4                          |
| AMZ159 | 39.15         | 4                          |
| AMZ160 | 36.97         | 3                          |
| AMZ161 | 46.73         | 0                          |
| AMZ162 | 39.57         | 0                          |
| AMZ164 | 51.41         | 0                          |
| AMZ165 | 27.21         | 1                          |
| AMZ169 | 63.62         | 0                          |
| AMZ171 | 40.73         | 3                          |
| AMZ172 | 38.7          | 1                          |
| AMZ173 | 30.05         | 2                          |
| AMZ174 | 40            | 0                          |
| AMZ175 | 67.88         | 0                          |
| AMZ177 | 84.15         | 0                          |
| AMZ179 | 54.81         | 0                          |
| AMZ180 | 97.1          | 0                          |
| AMZ182 | 74.71         | 1                          |
| AMZ183 | 41.09         | 0                          |

|        |       |    |
|--------|-------|----|
| AMZ184 | 37.07 | 2  |
| AMZ185 | 73.64 | 2  |
| AMZ186 | 44.98 | 0  |
| AMZ188 | 56.83 | 0  |
| AMZ189 | 18.57 | 14 |
| AMZ86  | 35.13 | 1  |
| AMZ87  | 31.94 | 0  |
| AMZ88  | 39.13 | 1  |
| AMZ89  | 31.33 | 2  |
| AMZ91  | 25.14 | 3  |
| AMZ94  | 50.69 | 1  |
| AMZ96  | 50.37 | 0  |
| AMZ97  | 45.63 | 0  |
| AMZ98  | 74.9  | 0  |
| GUN234 | 32.63 | 3  |
| GUN235 | 71.04 | 0  |
| GUN236 | 23.33 | 7  |
| GUN238 | 69.28 | 0  |
| GUN239 | 46.83 | 1  |
| GUN240 | 35.32 | 1  |
| GUN241 | 29.52 | 2  |
| GUN242 | 66.15 | 0  |
| GUN243 | 63.94 | 0  |
| GUN244 | 39.05 | 1  |
| GUN245 | 55.53 | 0  |
| GUN246 | 68.76 | 0  |
| GUN248 | 45.44 | 1  |
| GUN249 | 19.55 | 9  |
| GUN250 | 11.5  | 24 |
| GUN251 | 43.06 | 0  |
| GUN252 | 30.09 | 5  |
| GUN253 | 53.61 | 0  |
| GUN254 | 38.15 | 2  |
| GUN257 | 44.74 | 0  |
| GUN258 | 45.4  | 2  |
| GUN259 | 29.67 | 1  |
| GUN260 | 31.3  | 4  |
| GUN261 | 37.44 | 1  |
| GUN262 | 18.28 | 17 |
| GUN263 | 50.6  | 4  |
| GUN264 | 33.79 | 4  |
| GUN265 | 38.68 | 1  |
| GUN266 | 36.9  | 0  |
| GUN267 | 25.51 | 3  |
| GUN268 | 30.17 | 0  |
| GUN269 | 20.19 | 7  |
| GUN270 | 35.01 | 0  |
| GUN271 | 30.43 | 5  |
| GUN272 | 35.54 | 3  |
| GUN273 | 38.9  | 0  |

|       |       |     |
|-------|-------|-----|
| GUV01 | 17.24 | 11  |
| GUV03 | 29.29 | 7   |
| GUV06 | 17.64 | 6   |
| GUV07 | 28.09 | 2   |
| GUV08 | 25.02 | 6   |
| GUV09 | 21.75 | 4   |
| GUV10 | 22.27 | 3   |
| GUV11 | 27.6  | 2   |
| GUV12 | 65.39 | 0   |
| GUV14 | 23.38 | 3   |
| GUV15 | 27.49 | 8   |
| GUV19 | 20.05 | 5   |
| GUV20 | 38.06 | 0   |
| GUV24 | 25.49 | 3   |
| GUV28 | 17.52 | 5   |
| GUV29 | 35.51 | 0   |
| GUV30 | 43.68 | 0   |
| GUV31 | 23.45 | 2   |
| GUV32 | 26.91 | 5   |
| GUV33 | 58.41 | 0   |
| GUV34 | 28.17 | 0   |
| GUV35 | 5.05  | 113 |
| GUV36 | 9.79  | 29  |
| GUV38 | 24.96 | 1   |
| GUV41 | 25.6  | 2   |
| GUV42 | 34.73 | 38  |
| GUV43 | 22.85 | 6   |
| GUV44 | 23.07 | 5   |
| GUV45 | 29.41 | 1   |
| GUV46 | 33.05 | 1   |
| GUV47 | 39.73 | 1   |
| GUV48 | 30.22 | 0   |
| GUV49 | 26.76 | 3   |
| GUV50 | 48.45 | 0   |
| GUV51 | 46.4  | 0   |
| GUV52 | 39.29 | 0   |
| GUV53 | 14.44 | 7   |
| GUV54 | 35.12 | 0   |
| GUV55 | 28.01 | 1   |
| GUV56 | 35.14 | 1   |
| GUV57 | 41.67 | 1   |
| GUV59 | 29.77 | 1   |
| GUV60 | 41.38 | 1   |
| GUV62 | 45.54 | 0   |
| GUV64 | 66.06 | 0   |
| GUV65 | 39.39 | 0   |
| GUV66 | 34.96 | 2   |
| GUV67 | 39.57 | 5   |
| GUV69 | 29.36 | 2   |
| GUV77 | 24.95 | 3   |

|        |       |     |
|--------|-------|-----|
| GUV80  | 39.86 | 2   |
| GUV82  | 37.76 | 0   |
| GUV85  | 45.8  | 0   |
| GV1    | 36.78 | 4   |
| GV10   | 32.66 | 3   |
| GV15   | 45.83 | 3   |
| GV19   | 50.75 | 2   |
| GV2    | 27.3  | 3   |
| GV21   | 30.12 | 5   |
| GV22   | 21.01 | 2   |
| GV23   | 32.67 | 7   |
| GV24   | 23.62 | 9   |
| GV26   | 26.65 | 10  |
| GV28   | 34.53 | 2   |
| GV29   | 27.52 | 119 |
| GV3    | 16.66 | 22  |
| GV30   | 32.52 | 3   |
| GV34   | 42.66 | 4   |
| GV6    | 36.59 | 12  |
| GV9    | 58.16 | 2   |
| GVG1   | 26.15 | 8   |
| GVG10  | 21.34 | 16  |
| GVG12  | 18.06 | 17  |
| GVG19  | 32.37 | 3   |
| GVG26  | 25.37 | 9   |
| GVG28  | 39.75 | 9   |
| GVG29  | 41.61 | 7   |
| GVG3   | 44.81 | 1   |
| GVG30  | 40.52 | 4   |
| GVG5   | 33.99 | 8   |
| GVG6   | 34.76 | 7   |
| GVG7   | 33.4  | 9   |
| GVG8   | 32.99 | 5   |
| GVG9   | 51.74 | 2   |
| MET191 | 73.91 | 0   |
| MET192 | 42.3  | 0   |
| MET193 | 29.76 | 3   |
| MET194 | 31.63 | 1   |
| MET195 | 50.43 | 0   |
| MET196 | 70.02 | 0   |
| MET197 | 80.85 | 1   |
| MET199 | 37.46 | 1   |
| MET201 | 37.33 | 0   |
| MET202 | 29.83 | 0   |
| MET204 | 53.44 | 0   |
| MET205 | 30.15 | 4   |
| MET206 | 24.39 | 7   |
| MET207 | 24.02 | 2   |
| MET208 | 47.81 | 0   |
| MET209 | 47.82 | 4   |

|        |        |    |
|--------|--------|----|
| MET210 | 40.42  | 1  |
| MET211 | 56.67  | 0  |
| MET212 | 40.05  | 3  |
| MET213 | 62.07  | 0  |
| MET214 | 37.12  | 1  |
| MET215 | 27.86  | 7  |
| MET216 | 21.29  | 4  |
| MET217 | 38.13  | 7  |
| MET218 | 47.66  | 3  |
| MET219 | 53.71  | 0  |
| MET220 | 45.89  | 1  |
| MET222 | 62.94  | 0  |
| MET224 | 44.39  | 3  |
| MET225 | 21.99  | 12 |
| MET226 | 32.32  | 1  |
| MET229 | 13.39  | 17 |
| MET230 | 85.09  | 0  |
| MET231 | 102.69 | 0  |
| PUT274 | 41.01  | 0  |
| PUT279 | 29.47  | 1  |
| PUT280 | 36.43  | 0  |
| PUT281 | 31.51  | 3  |
| PUT282 | 26.85  | 4  |
| PUT283 | 34.73  | 2  |
| PUT288 | 34.19  | 3  |
| PUT289 | 33.5   | 3  |
| PUT294 | 37.65  | 2  |
| PUT295 | 45.19  | 3  |
| PUT296 | 42.79  | 8  |
| PUT297 | 35.25  | 1  |
| PUT298 | 27.26  | 5  |
| PUT300 | 41.09  | 0  |
| PUT305 | 31.95  | 4  |
| PUT306 | 32.27  | 2  |
| PUT307 | 39.2   | 1  |
| PUT308 | 31.21  | 1  |
| PUT309 | 35.67  | 5  |
| PUT310 | 22.26  | 0  |
| PUT317 | 34.05  | 4  |
| PUT319 | 24.12  | 7  |
| PUT321 | 35.42  | 3  |
| PUT324 | 28.97  | 2  |
| PUT325 | 31.78  | 0  |
| PUT327 | 34.1   | 3  |
| PUT329 | 29.32  | 2  |
| PUT330 | 34.95  | 1  |
| PUT331 | 44.84  | 4  |
| PUT332 | 28.3   | 1  |
| PUT334 | 31.6   | 0  |
| PUT336 | 36.37  | 2  |

|        |       |    |
|--------|-------|----|
| PUT337 | 34.09 | 4  |
| PUT338 | 21.92 | 4  |
| PUT339 | 41.07 | 0  |
| PUT342 | 30.37 | 2  |
| PUT346 | 35.31 | 2  |
| PUT347 | 26.72 | 4  |
| PUT348 | 22.6  | 6  |
| PUT349 | 39.08 | 2  |
| PUT350 | 35.51 | 1  |
| PUT351 | 25.12 | 2  |
| PUT353 | 35.33 | 2  |
| PUT355 | 26.29 | 6  |
| PUT357 | 15.6  | 11 |
| PUT360 | 17.61 | 9  |
| PUT362 | 26.51 | 0  |
| PUT366 | 14.92 | 13 |
| PUT369 | 15.82 | 10 |
| PUT370 | 33.88 | 1  |
| PUT371 | 36.01 | 0  |
| PUT372 | 26.76 | 2  |
| PUT374 | 20.9  | 5  |
| PUT375 | 33.07 | 38 |
| PUT376 | 51.06 | 2  |
| PUT377 | 25.58 | 2  |
| PUT378 | 37.44 | 3  |
| PUT382 | 30.47 | 3  |
| PUT384 | 27.99 | 0  |
| PUT385 | 32.76 | 0  |
| PUT386 | 23.82 | 3  |
| PUT387 | 32.03 | 0  |
| PUT388 | 26.92 | 3  |
| PUT389 | 25.04 | 0  |
| PUT390 | 33.82 | 1  |
| PUT392 | 32.12 | 1  |
| PUT394 | 26.46 | 4  |
| PUT395 | 30.27 | 2  |

---



Supplementary Table 2. Molecular diversity indices in the NRY (upper half) and the mtDNA (lower half)

| <b>NRY</b>  |    |        |     |      |       |         |         |       |        |        |       |                |
|-------------|----|--------|-----|------|-------|---------|---------|-------|--------|--------|-------|----------------|
| Population  | N  | No.hap | S   | GD   | GD.SD | ND      | ND.SD   | MPD   | MPD.SD | TajD   | Pval  | Family         |
| Yucu-Matapi | 24 | 10     | 98  | 0.74 | 0.09  | 1.1E-05 | 4.9E-06 | 25.45 | 11.57  | -0.119 | 0.511 | Arawakan       |
| Curripaco   | 13 | 12     | 133 | 0.99 | 0.04  | 1.5E-05 | 6.8E-06 | 34.62 | 16.14  | -0.879 | 0.170 | Arawakan       |
| Ach-Piapoco | 20 | 15     | 221 | 0.97 | 0.03  | 1.8E-05 | 8.2E-06 | 42.61 | 19.30  | -1.313 | 0.070 | Arawakan       |
| Carijona    | 5  | 5      | 88  | 1.00 | 0.13  | 1.6E-05 | 8.5E-06 | 38.00 | 20.03  | -0.762 | 0.318 | Carib          |
| Desano      | 14 | 5      | 42  | 0.59 | 0.14  | 2.8E-06 | 1.4E-06 | 6.60  | 3.32   | -2.179 | 0.004 | Tukanoan       |
| Pira-Wanano | 11 | 5      | 14  | 0.78 | 0.09  | 1.4E-06 | 7.6E-07 | 3.24  | 1.81   | -1.423 | 0.082 | Tukanoan       |
| Siona       | 10 | 9      | 155 | 0.98 | 0.05  | 1.7E-05 | 8.3E-06 | 41.22 | 19.59  | -1.233 | 0.118 | Tukanoan       |
| Coreguaje   | 11 | 10     | 112 | 0.98 | 0.05  | 1.2E-05 | 5.9E-06 | 29.42 | 13.95  | -1.107 | 0.146 | Tukanoan       |
| Sikuani     | 13 | 6      | 93  | 0.79 | 0.09  | 1.3E-05 | 6.3E-06 | 31.77 | 14.84  | 0.273  | 0.634 | Guahiban       |
| Guayabero   | 17 | 9      | 348 | 0.90 | 0.04  | 3.8E-05 | 1.7E-05 | 88.78 | 40.19  | -0.593 | 0.296 | Guahiban       |
| Guay_noC2   | 15 | 8      | 99  | 0.89 | 0.05  | 1.6E-05 | 7.2E-06 | 36.70 | 16.93  | 0.901  | 0.842 | Guahiban       |
| Saliba      | 8  | 8      | 172 | 1.00 | 0.06  | 2.3E-05 | 1.1E-05 | 53.71 | 26.07  | -1.041 | 0.164 | Piaroa-Saliban |
| Mur-Uitoto  | 13 | 13     | 412 | 1.00 | 0.03  | 3.1E-05 | 1.4E-05 | 72.97 | 33.66  | -2.077 | 0.004 | Huitotoan      |
| Mur-Ui_noC2 | 12 | 12     | 166 | 1.00 | 0.03  | 1.6E-05 | 7.5E-06 | 37.79 | 17.70  | -1.466 | 0.058 | Huitotoan      |
| Puinave     | 16 | 10     | 126 | 0.90 | 0.06  | 9.8E-06 | 4.6E-06 | 23.26 | 10.81  | -1.678 | 0.035 | Maku-Puinave   |
| Nukak       | 11 | 5      | 48  | 0.82 | 0.08  | 1.0E-05 | 4.8E-06 | 23.75 | 11.33  | 2.118  | 0.998 | Maku-Puinave   |
| Tikuna      | 10 | 10     | 215 | 1.00 | 0.04  | 2.2E-05 | 1.1E-05 | 52.76 | 24.98  | -1.527 | 0.050 | Tikuna         |
| Cocama      | 9  | 9      | 211 | 1.00 | 0.05  | 2.0E-05 | 9.7E-06 | 48.00 | 23.01  | -1.984 | 0.001 | Tupi           |
| Yagua       | 10 | 6      | 81  | 0.87 | 0.09  | 1.2E-05 | 5.7E-06 | 28.07 | 13.45  | -0.098 | 0.509 | Peba-Yaguan    |

N: number of individuals

No.hap: number of haplotypes

S: number of segregating sites

GD, GD.SD: gene diversity and standard deviation

ND, ND.SD: nucleotide diversity and standard deviation

MPD, MPD.SD: mean number of pairwise differences and standard deviation

TajD: Tajima's D value

Pval: P values of Tajima's D

**mtDNA**

| Population  | N  | No.hap | S   | GD   | GD.SD | ND      | ND.SD   | MPD   | MPD.SD | TajD   | Pval  | Family         |
|-------------|----|--------|-----|------|-------|---------|---------|-------|--------|--------|-------|----------------|
| Yucu-Matapi | 39 | 19     | 150 | 0.88 | 0.05  | 2.3E-03 | 1.1E-03 | 37.38 | 16.61  | -0.211 | 0.440 | Arawakan       |
| Curripaco   | 17 | 11     | 111 | 0.88 | 0.07  | 2.3E-03 | 1.2E-03 | 38.54 | 17.64  | -0.141 | 0.456 | Arawakan       |
| Ach-Piapoco | 24 | 8      | 105 | 0.77 | 0.07  | 2.1E-03 | 1.1E-03 | 34.60 | 15.62  | 0.363  | 0.719 | Arawakan       |
| Carijona    | 8  | 6      | 97  | 0.89 | 0.11  | 2.6E-03 | 1.4E-03 | 42.71 | 20.80  | -0.257 | 0.405 | Carib          |
| Desano      | 17 | 14     | 139 | 0.98 | 0.03  | 2.4E-03 | 1.2E-03 | 40.40 | 18.47  | -0.546 | 0.322 | Tukanoan       |
| Pira-Wanano | 13 | 11     | 119 | 0.96 | 0.05  | 2.4E-03 | 1.2E-03 | 39.08 | 18.18  | -0.389 | 0.368 | Tukanoan       |
| Siona       | 17 | 8      | 87  | 0.82 | 0.07  | 2.0E-03 | 1.0E-03 | 32.31 | 14.84  | 0.194  | 0.613 | Tukanoan       |
| Coreguaje   | 19 | 12     | 104 | 0.92 | 0.05  | 2.0E-03 | 1.0E-03 | 33.70 | 15.37  | -0.147 | 0.508 | Tukanoan       |
| Sikuani     | 16 | 7      | 55  | 0.87 | 0.05  | 1.5E-03 | 7.6E-04 | 24.08 | 11.18  | 1.310  | 0.941 | Guahiban       |
| Guayabero   | 35 | 11     | 80  | 0.88 | 0.03  | 2.3E-03 | 1.1E-03 | 37.31 | 16.62  | 2.318  | 0.992 | Guahiban       |
| Saliba      | 16 | 7      | 108 | 0.86 | 0.06  | 2.3E-03 | 1.2E-03 | 37.49 | 17.22  | 0.046  | 0.577 | Piaroa-Saliban |
| Mur-Uitoto  | 26 | 23     | 159 | 0.99 | 0.01  | 2.3E-03 | 1.1E-03 | 37.46 | 16.84  | -0.841 | 0.207 | Huitotoan      |
| Puinave     | 19 | 9      | 93  | 0.85 | 0.06  | 2.3E-03 | 1.2E-03 | 37.89 | 17.25  | 0.630  | 0.788 | Maku-Puinave   |
| Nukak       | 16 | 4      | 56  | 0.64 | 0.10  | 1.9E-03 | 9.7E-04 | 31.07 | 14.33  | 1.925  | 0.989 | Maku-Puinave   |
| Tikuna      | 18 | 13     | 109 | 0.94 | 0.04  | 2.2E-03 | 1.1E-03 | 37.02 | 16.90  | 0.399  | 0.722 | Tikuna         |
| Cocama      | 17 | 14     | 143 | 0.98 | 0.03  | 2.7E-03 | 1.4E-03 | 44.64 | 20.37  | -0.580 | 0.274 | Tupi           |
| Yagua       | 13 | 8      | 98  | 0.92 | 0.05  | 2.3E-03 | 1.2E-03 | 37.26 | 17.35  | 0.205  | 0.646 | Peba-Yaguan    |

N: number of individuals

No.hap: number of haplotypes

S: number of segregating sites

GD, GD.SD: gene diversity and standard deviation

ND, ND.SD: nucleotide diversity and standard deviation

MPD, MPD.SD: mean number of pairwise differences and standard deviation

TajD: Tajima's D value

Pval: P values of Tajima's D

Supplementary table 3A. AMOVA results of five replica datasets for the mtDA and NRY

|                    | mtDNA % of variation |           |           |           |           |           |        | NRY % of variation |           |           |           |           |           |       |
|--------------------|----------------------|-----------|-----------|-----------|-----------|-----------|--------|--------------------|-----------|-----------|-----------|-----------|-----------|-------|
|                    | d.f                  | replica 1 | replica 2 | replica 3 | replica 4 | replica 5 | mean   | d.f.               | replica 1 | replica 2 | replica 3 | replica 4 | replica 5 | mean  |
| Among populations  | 3                    | 9.36      | 6.14      | 4.51      | 7.41      | 11.53     | 7.79   | 3                  | 17.62     | 16.66     | 16.98     | 16.62     | 16.42     | 16.86 |
| Within populations | 73                   | 90.84     | 93.86     | 95.45     | 91.59     | 88.47     | 92.042 | 73                 | 82.38     | 83.34     | 83.02     | 83.38     | 83.58     | 83.14 |
| Total              | 76                   | 100.2     | 100       | 100       | 100       | 100       | 100.04 | 76                 | 100       | 100       | 100       | 100       | 100       | 100   |
| $F_{ST}$           |                      | 0.094     | 0.061     | 0.05      | 0.08      | 0.12      | 0.081  |                    | 0.18      | 0.17      | 0.17      | 0.17      | 0.17      | 0.172 |

Supplementary table 3B. Nucleotide diversity and standard deviations for each replica dataset

|           |         | mtDNA   |         | NRY     |     |
|-----------|---------|---------|---------|---------|-----|
|           |         | nuc.div | S.D     | nuc.div | S.D |
| Replica 1 | nuc.div | 2.3E-03 | 1.9E-05 |         |     |
|           | S.D     | 1.1E-03 | 8.2E-06 |         |     |
| Replica 2 | nuc.div | 2.3E-03 | 2.0E-05 |         |     |
|           | S.D     | 1.1E-03 | 8.7E-06 |         |     |
| Replica 3 | nuc.div | 2.2E-03 | 1.9E-05 |         |     |
|           | S.D     | 1.1E-03 | 8.5E-06 |         |     |
| Replica 4 | nuc.div | 2.3E-03 | 2.0E-05 |         |     |
|           | S.D     | 1.1E-03 | 8.6E-06 |         |     |
| Replica 5 | nuc.div | 2.3E-03 | 1.9E-05 |         |     |
|           | S.D     | 1.1E-03 | 8.5E-06 |         |     |
